# Supplementary material for: Self-poled and transparent polyvinylidene fluoride-co-hexafluoropropylene-based piezoelectric devices for printable and flexible electronics
Source: Royal Society of Chemistry journal article supplement (doi:10.1039/d2nr05986j), 2023-01-01
Supplement: d2nr05986j1.pdf [file d2nr05986j1.pdf]

**Supporting information:**

**Self-poled and transparent polyvinylidene fluoride-co-  
hexafluoropropylene-based piezoelectric devices for printable and flexible  
electronics**

Hai Li <sup>a</sup>, Sooman Lim <sup>a,\*</sup>

*<sup>a</sup> Department of Flexible and Printable Electronics, LANL-JBNU Engineering Institute,  
Jeonbuk National University, Jeonju, 54896, Republic of Korea*

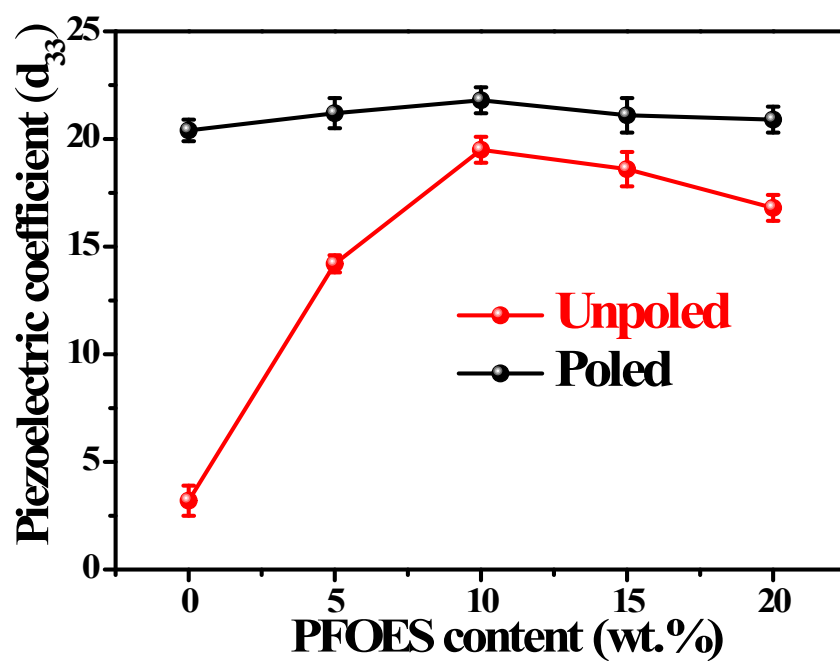

**Figure S1.** Piezoelectric coefficient ( $d_{33}$ ) of PFOES/PVDF-HFP composite films with various PFOES contents.

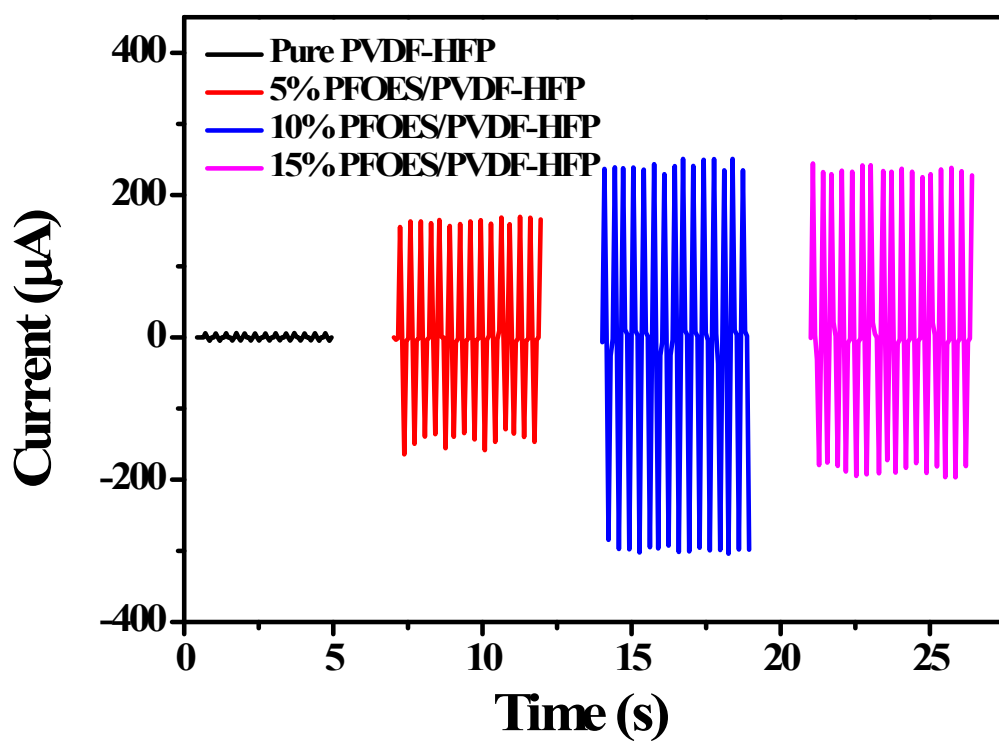

**Figure S2.** Output current of the as-printed films with various PFOES contents.

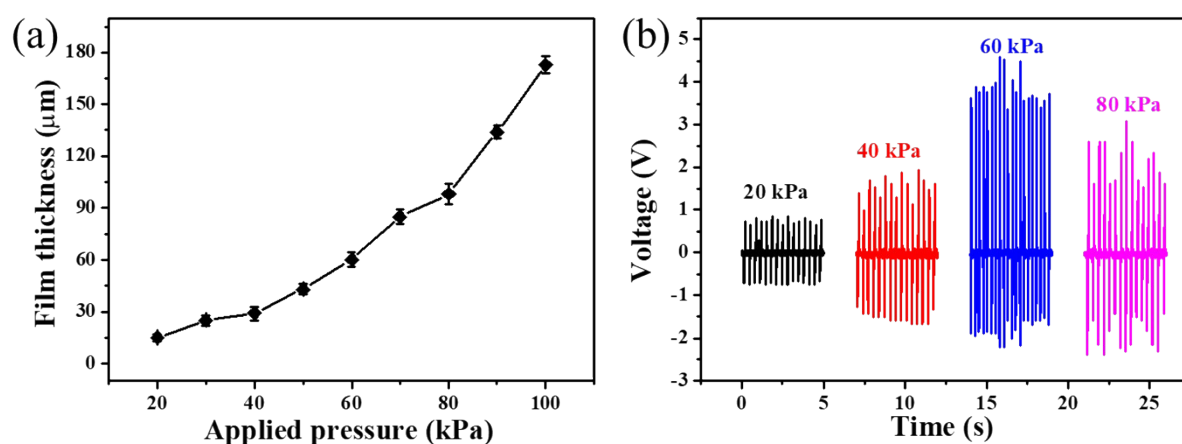

**Figure S3.** (a) Relationship between film thickness and air pressure. (b) Relationship between film thickness and output voltages.

**Table S1** Summary of self-poled PVDF-based PENGs in our study and other reported studies.

| Material                         | Fabrication method | $\beta$ -phase content (%) | Voltage (V) | Power ( $\mu$ W) | Ref.      |
|----------------------------------|--------------------|----------------------------|-------------|------------------|-----------|
| PVDF-HFP/h-BN/BaTiO <sub>3</sub> | Solution casting   | 46                         | 2.4         | 0.89             | 1         |
| PVDF-HFP/BTO/Ag                  | Solution casting   | 45.6                       | 2.21        | 0.22             | 2         |
| PVDF-HFP/ Co-ZnO                 | Electrospinning    | 54.6                       | 2.8         | None             | 3         |
| PVDF/MnO <sub>2</sub>            | Electrospinning    | 92                         | 3.2         | None             | 4         |
| PVDF/BaTiO <sub>3</sub>          | Printing           | 78                         | 4           | None             | 5         |
| PVDF/SWCNT                       | Printing           | 69.3                       | 2           | 2.1              | 6         |
| PVDF/Graphene                    | Printing           | 67.3                       | 2.5         | None             | 7         |
| PVDF-HFP/PFOES                   | Printing           | 82.7                       | 6.2         | 6.9              | This work |

## References

1. Ponnammam, Deepalekshmi, and Mariam Al Ali Al-Maadeed. "Influence of BaTiO<sub>3</sub>/white graphene filler synergy on the energy harvesting performance of a piezoelectric polymer nanocomposite." *Sustainable energy & fuels* 3.3 (2019): 774-785.
2. Bouhamed A, Binyu Q, Böhm B, et al. A hybrid piezoelectric composite flexible film based on PVDF-HFP for boosting power generation[J]. *Composites Science and Technology*, 2021, 208: 108769.
3. Parangusan H, Ponnammam D, Al-Maadeed M A A. Stretchable electrospun PVDF-HFP/Co-ZnO nanofibers as piezoelectric nanogenerators[J]. *Scientific reports*, 2018, 8(1): 1-11.
4. Zhao, Qiuying, Lu Yang, Kaineng Chen, Yizhou Ma, Qirui Peng, Hongli Ji, and Jinhao Qiu. "Flexible textured MnO<sub>2</sub> nanorods/PVDF hybrid films with superior piezoelectric performance for energy harvesting application." *Composites Science and Technology* 199 (2020): 108330.
5. Bodkhe S, Turcot G, Gosselin F P, et al. One-step solvent evaporation-assisted 3D printing of piezoelectric PVDF nanocomposite structures[J]. *ACS applied materials & interfaces*, 2017, 9(24): 20833-20842.

6. Shepelin, Nick A., et al. "Printed recyclable and self-poled polymer piezoelectric generators through single-walled carbon nanotube templating." *Energy & Environmental Science* 13.3 (2020): 868-883.
7. Wang A, Chen C, Liao L, et al. Enhanced  $\beta$ -phase in direct ink writing PVDF thin films by intercalation of Graphene[J]. *Journal of Inorganic and Organometallic Polymers and Materials*, 2020, 30(5): 1497-1502.
